Structurally-informed STOK

1 **Title**

2

3

4

5

6 **Structure supports function: informing directed and dynamic**  
7 **functional connectivity with anatomical priors**  
8

9

10 David Pascucci<sup>1,2,\*</sup>, Maria Rubega<sup>3</sup>, Joan Rué-Queralt<sup>2,4</sup>, Sebastien Tourbier<sup>4</sup>, Patric Hagmann<sup>4</sup>,  
11 Gijs Plomp<sup>2</sup>

12

13 <sup>1</sup>Brain Mind Institute, École Polytechnique Fédérale de Lausanne (EPFL), Lausanne, Switzerland.

14 <sup>2</sup>Perceptual Networks Group, University of Fribourg, Fribourg, Switzerland.

15 <sup>3</sup>Department of Neurosciences, University of Padova, Padova, Italy.

16 <sup>4</sup>Connectomics Lab, Dept. of Radiology, University Hospital of Lausanne and University of Lausanne (CHUV-UNIL),  
17 Lausanne, Switzerland.

18

19

20

21

22

23

24

25

26

27

28 \*Corresponding author(s): David Pascucci ([david.pascucci@epfl.ch](mailto:david.pascucci@epfl.ch))

## Structurally-informed STOK

### 29 **Abstract**

30 The dynamic repertoire of functional brain networks is constrained by the underlying topology of  
31 structural connections: the lack of a direct structural link between two brain regions prevents direct  
32 functional interactions. Despite the intrinsic relationship between structural (SC) and functional  
33 connectivity (FC), integrative and multimodal approaches to combine the two remain limited,  
34 especially for electrophysiological data. In the present work, we propose a new linear adaptive filter  
35 for estimating dynamic and directed FC using structural connectivity information as priors. We  
36 tested the filter in rat epicranial recordings and human event-related EEG data, using SC priors from  
37 a meta-analysis of tracer studies and diffusion tensor imaging metrics, respectively. Our results  
38 show that SC priors increase the resilience of FC estimates to noise perturbation while promoting  
39 sparser networks under biologically plausible constraints. The proposed filter provides intrinsic  
40 protection against SC-related false negatives, as well as robustness against false positives,  
41 representing a valuable new method for multimodal imaging and dynamic FC analysis.

42

43

44

45

46

47

48

49

50

51

52

53

54

55

## Structurally-informed STOK

### 56 **Introduction**

57 The white matter architecture of the human brain constitutes the structural backbone for neuronal  
58 communication. A fixed network of axonal pathways wires an extremely rich repertoire of brain  
59 functions, from short-range interactions to large-scale dynamics that support perception, cognition,  
60 and action (Petersen & Sporns, 2015). As in all biological systems, properties of the structure  
61 constrain the possible functions. Organizational principles of structural brain networks, such as  
62 small-world and modular architectures, determine the topological space for functional interactions  
63 at the meso- and macro-scale (Hagmann et al., 2008; Sporns, 2010). At the microscale, the absence  
64 of a synaptic connection between two neurons makes a direct functional coupling biologically  
65 impossible. Despite the inherent link between structural (SC) and functional brain connectivity  
66 (FC), the two have been mostly investigated separately, and the potential benefits of integrative and  
67 multimodal approaches combining SC and FC remain largely unexplored (Lei et al., 2015).

68 The relationship between structural wiring and functional coupling is at the core of several  
69 statistical and biophysical models of brain networks (Honey et al., 2010). These models advocate a  
70 substantial overlap between SC and FC, both at the mesoscopic and macroscopic scales. Empirical  
71 and modelling studies on resting-state brain networks provide converging support, showing that the  
72 weights of structural and functional networks, as well as their topological features, tend to be  
73 correlated, and the strength of between-regions SC is typically a good predictor of their FC (Deco et  
74 al., 2013; Honey et al., 2009; Mišić et al., 2016; Skudlarski et al., 2008). Given the established  
75 overlap between structure and function, measures of FC may be meaningfully improved by taking  
76 SC into account, as suggested by a few proposed methods. In the framework of Bayesian modeling,  
77 for instance, structural graphs have been incorporated as priors for generative models of FC  
78 (Sokolov et al., 2019). A structural graph is typically obtained from in vivo diffusion-weighted  
79 imaging data (DWI) that quantify the anisotropy in the diffusion of water molecules along white  
80 matter tracts (Hagmann et al., 2008). The connectivity graph is either a binary or weighted  
81 undirected adjacency matrix that provides information about the presence and strength of a physical  
82 link between distinct brain regions. It has been shown how adding SC graphs as priors for effective  
83 connectivity substantially improves model evidence (Sokolov et al., 2019). Similarly, constraining  
84 FC for only present SC links and anatomically determined time lags may reduce false positives and  
85 improve the spatial resolution of electroencephalography (EEG) source imaging (Filatova et al.,  
86 2018; Takeda et al., 2019).

87 Whereas previous work has focused mainly on combining SC and FC for the analysis of  
88 functional Magnetic Resonance Imaging data (fMRI), similar integrative approaches are missing for  
89 the emerging field of time-varying directed FC analysis (Eichenbaum et al., 2021). Time-varying

## Structurally-informed STOK

90 FC characterizes the dynamics of directed neuronal interactions that evolve at the millisecond scale,  
91 exploiting high-temporal resolution recordings, such as local field potentials and EEG source  
92 imaging data (Milde et al., 2010; Pascucci et al., 2018; Plomp et al., 2014). We here use the more  
93 general term FC throughout the paper, referring to these directed and dynamic measures of FC.  
94 Recently, we introduced a variant of the classic Kalman filter, the Self-Tuning Optimized Kalman  
95 filter (STOK; Pascucci et al., 2019), for modeling rapid changes in large-scale functional networks  
96 during evoked brain activity. Here, we present an extension of this algorithm that incorporates prior  
97 information on the structural connectivity: the structurally informed STOK (si-STOK). The  
98 algorithm provides a straightforward and novel tool to combine SC (e.g., DTI-derived metrics) with  
99 dynamic FC. We tested the algorithm in benchmark data and evaluated the effect of different SC  
100 matrices on the estimated FC. We demonstrated the advantages of combining SC with FC in terms  
101 of noise resilience and consistency of the estimates. We then compared the two algorithms in event-  
102 related large-scale functional brain networks during face processing. Our results showed that  
103 incorporating SC in dynamic FC promotes sparser and physiologically plausible topologies of  
104 functional networks, aiding the identification of the main network drivers and dynamics. Matlab  
105 and Python code for si-STOK are available on GitHub ([https://github.com/PscDavid/dynet\\_toolbox](https://github.com/PscDavid/dynet_toolbox);  
106 <https://github.com/joanrue/pydynet>).

## 107 **Results**

### 108 **Somatosensory evoked potentials in rats**

109 To incorporate structural priors in dynamic functional connectivity, we developed a variant of the  
110 self-tuning optimized Kalman filter (STOK) (Pascucci et al., 2019). The STOK is an adaptive filter  
111 that derives time-varying Multivariate Autoregressive coefficients (tv-MVAR) using a simple least-  
112 squares regression of present on past signals. We exploited this core feature of the filter to  
113 incorporate SC as shrinking priors of a least-squares solution (see Methods, Eq. [7]). SC matrices  
114 were used to calibrate the variance of a prior expectation of zero FC between each pair of nodes  
115 (Sokolov et al., 2019) (Figure 1). Strong SC values correspond to large prior variance, allowing FC  
116 to deviate from zero, whereas weak SC values reduce the prior variance and shrink FC toward zero.  
117 Hence, the filter's estimates combine the strength of SC with the FC supported by the data (see  
118 Methods and Figure 1).

119

120

121

122

## Structurally-informed STOK

123

### a) MVAR model (STOK)

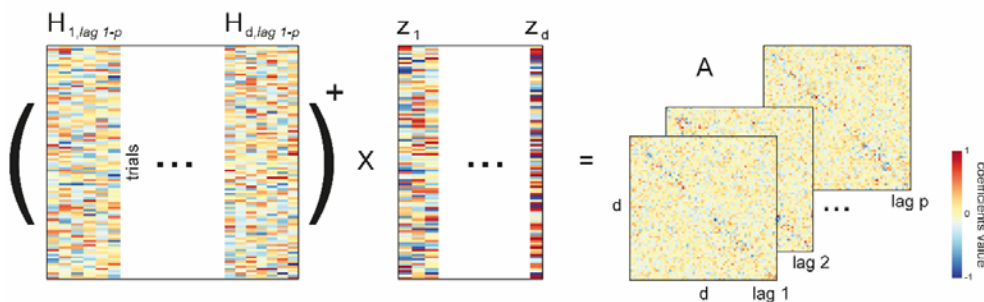

### b) Structural connectivity priors

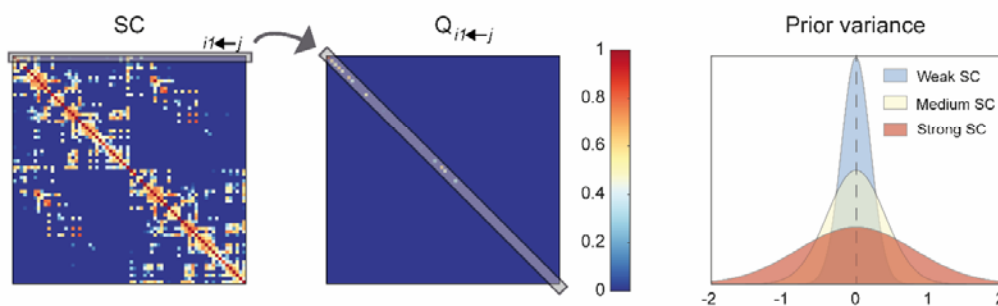

### c) SC-informed FC (si-STOK)

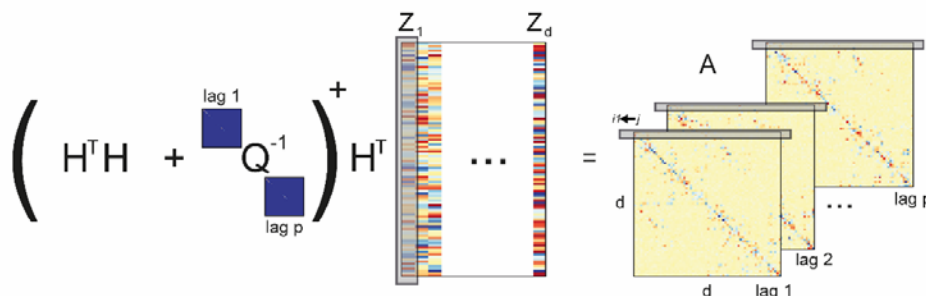

124

## 125 **Figure 1**

126 Estimation of structurally-informed dynamic FC using the si-STOK filter. a) A least-squares solution is used to estimate  
 127 the coefficient matrix ( $A$ ) of a time-varying Multivariate Autoregressive Model by regressing past ( $H$ ) on present ( $Z$ )  
 128 values of the multivariate time-series (see eq. [4], the symbol  $+$  stands for the matrix pseudoinverse). b) SC priors (e.g.,  
 129 DTI metrics) are incorporated in the filter as the prior variance on the expected zero FC from all the sender nodes to  
 130 each receiver node. Weak SC corresponds to small prior variance, shrinking the coefficient estimates toward zero;  
 131 strong SC corresponds to large prior variance, allowing the estimated coefficients to deviate more from zero when  
 132 supported by the data. c) The regularizing matrix  $Q$  informs the least-squares solution with priors on the variance of  
 133 autoregressive coefficients based on SC, resulting in MVAR models that combine FC and SC.

134

135

136 We tested the proposed algorithm, termed structurally informed STOK (si-STOK), on a  
 137 benchmark dataset of epicranial EEG recordings in rats, from a whisker stimulation protocol

## Structurally-informed STOK

138 (Plomp et al., 2014; Quairiaux et al., 2011). After whisker stimulation, action potentials originate  
139 and propagate rapidly (e.g., within 10-25 ms) from the contralateral primary sensory cortex,  
140 following the underlying structural connectivity (Plomp et al., 2014) (see Figure 2a). This pattern  
141 was accurately recovered by the STOK filter, which detected an overall larger Magnitude of  
142 outgoing Directed Influences (MDI, see Methods) from the contralateral sensory cortex (e4), at  
143 early post-stimulus latencies (13 ms, see Figure 2a and Pagnotta et al., 2018; Pagnotta & Plomp,  
144 2018; Plomp et al., 2014). We used a directed, weighted matrix of SC that we derived from a meta-  
145 analysis of reported structural connections (Bota et al., 2015; Swanson et al., 2017) (see Methods).  
146 Compared to the regular STOK filter, the inclusion of SC priors provided qualitatively similar  
147 results, with clearer dynamics and visible but minor changes (Figure 2a). The similarity between the  
148 results of the two algorithms was a consequence of the use of a dense SC matrix, with connection  
149 weights that did not deviate drastically from the estimated FC. When evaluating the magnitude of  
150 outgoing influences from e4 to all the other nodes, indeed, the results were highly comparable  
151 (Figure 2b). However, incorporating a sparser SC matrix, with only 25% of the strongest SC  
152 connections, led to evident changes. When one of the expected FC connections (from e4 to e2) was  
153 absent in SC, the resulting estimate decreased considerably (Figure 2b). Nevertheless, FC from e4  
154 to e2 was still larger compared to two other SC-absent connections (from e4 to e1 and from e4 to  
155 e8) for which weak or no FC was supported by the data. Conversely, for connections with weak FC,  
156 strong SC did not drastically increase FC. This demonstrated that in the present modeling  
157 framework the inclusion of structural priors has a low risk of producing false negatives (the  
158 downscaling of FC for absent SC depends also on the strength of FC) while it is also robust against  
159 the risk of introducing false positives driven by strong SC in the absence of FC.

160 To better appreciate the advantages of combining SC and FC, we compared the  
161 performance of the two algorithms under noise perturbations. We evaluated two criteria (see  
162 Methods): 1) the consistency of the estimated network at the e4 peak latency; 2) the ability to detect  
163 e4 as the main driver compared to the average network activity. The two criteria were tested by  
164 varying the ratio of noise to signal. As evident in Figure 2c, the si-STOK outperformed the regular  
165 STOK for both criteria at all the noise levels. This highlighted an additional important feature of the  
166 new filter: when FC is informed by SC, the estimated networks become more resilient to noise and  
167 present a consistent topology and nodal strength under perturbations.

## Structurally-informed STOK

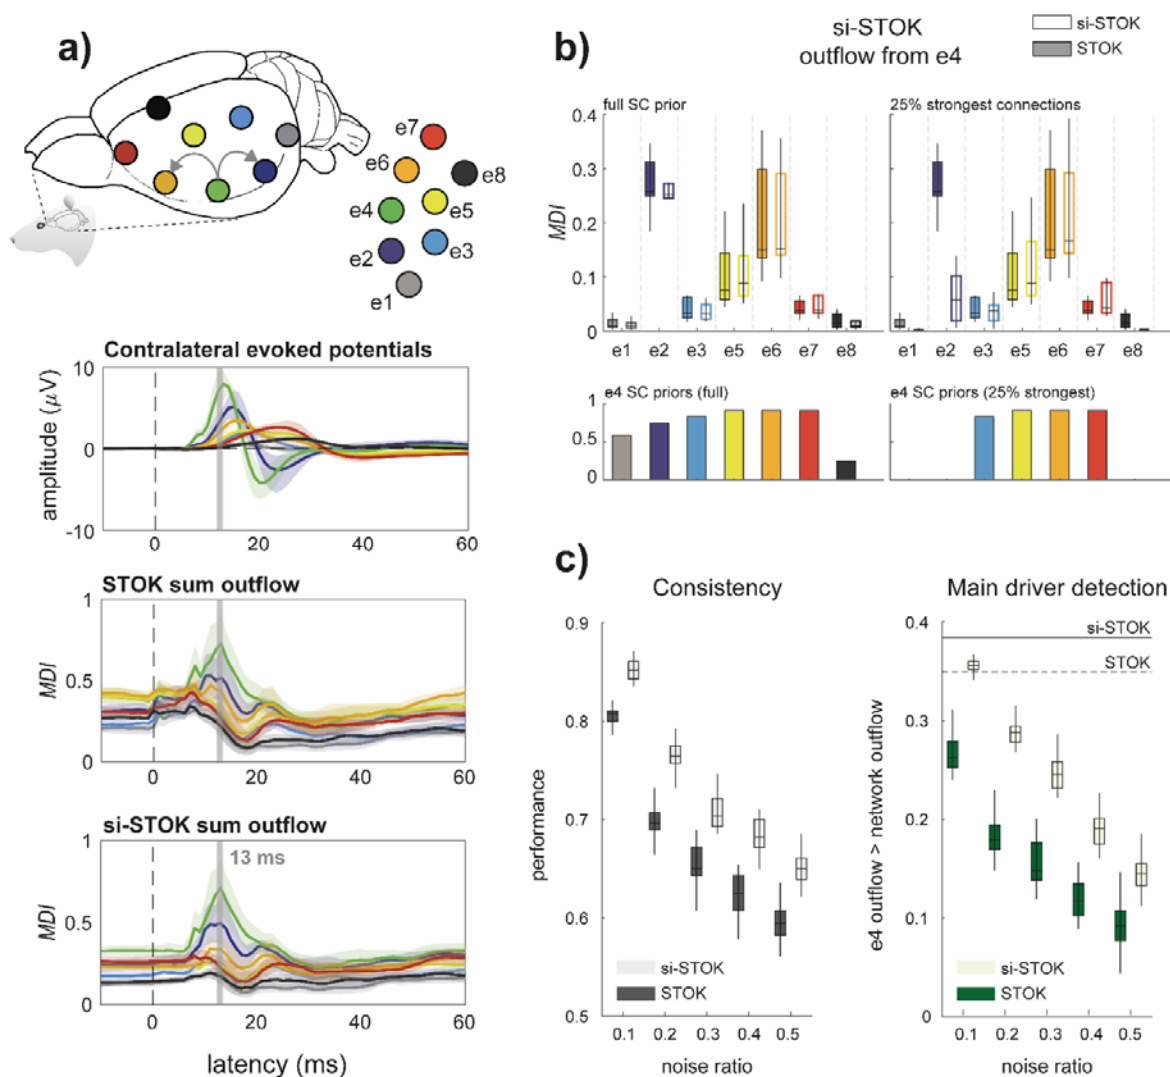

168

### 169 **Figure 2**

170 Validation in benchmark rat EEG data. a) Contralateral evoked potentials after whisker stimulation, showing the peak in  
 171 the primary sensory cortex (e4). Activity propagates rapidly after stimulation from the primary sensory cortex to nearby  
 172 parietal and frontal regions (e2 and e6). The role of the primary sensory cortex as the main driver of evoked activity is  
 173 evident from the summed Magnitude of outgoing Directed Influences (MDI) estimated with both the STOK and the si-  
 174 STOK filters. b) Effect of incorporating SC priors in the estimated directed influences from e4 to the rest of the network  
 175 at the peak latency of the evoked activity (13 ms). Boxplots summarize the results of the STOK filter with (empty  
 176 boxplots) and without (filled boxplots) SC priors, across ten animals. By using a dense SC matrix with almost uniform  
 177 priors, the estimated FC are highly similar with and without SC priors. Retaining only 25% of the strongest SC  
 178 connections demonstrates the relative shrinkage of SC-absent FC and the resistance of the algorithm against SC-related  
 179 false positives: under an SC-absent prior, the expected FC from e4 to e2 was still larger compared to other connections,  
 180 whereas strong SC priors did not inflate FC when weak FC was supported by the data (e.g., from e4 to e5). c)  
 181 Performance evaluation under noise perturbations, after varying the proportion of signal to noise (additive) in the  
 182 original data. Compared to the regular STOK, the si-STOK FC estimates showed overall larger consistency with the FC  
 183 estimated in the absence of additional noise, as the proportion of noise perturbing the data increased (left panel).  
 184 Similarly, the si-STOK showed a higher ability to detect the contralateral primary sensory cortex as the main driver of  
 185 network activity at peak evoked latencies (right panel, the black line indicates the estimated e4 outflow, subtracted from  
 186 the average network outflow at 13 ms, with the si-STOK in the absence of noise perturbations; the dashed line indicates

## Structurally-informed STOK

187 the estimate obtained with the regular STOK). SC priors lead to an increased ability to detect e4 as the main network  
188 driver at all noise levels tested. Shaded lines in (a) are 95% CI of the mean.

189

### 190 **Human EEG data**

191 After validating the algorithm in benchmark data recorded in rats, we employed the si-STOK filter  
192 to model FC in event-related human EEG data. We modeled FC in a large-scale network of 68 brain  
193 regions in response to faces and scrambled stimuli (Desikan et al., 2006) (see Methods and Figure  
194 3a). On the electrode level, the comparison of evoked responses between faces and scrambled  
195 images revealed the typical topography and time-course of the face-related N170 component (faces  
196 minus scrambled, peak at 160 ms) with the largest difference between conditions localized in the  
197 right fusiform and nearby occipitotemporal areas (see Figure 3b).

198 Figure 3c shows the effect of incorporating SC priors on the estimated FC at a time window  
199 of interest around the N170 response. FC matrices obtained through the si-STOK filter showed the  
200 clear shrinkage of functional connections for weak and absent SC, leading to FC matrices that partly  
201 inherit the structure of SC but preserved intrinsic patterns of FC coupling (see Figure 3c), in line  
202 with the benchmark results. For the same time window of evoked activity, we compared the  
203 summed outflow from each area between the two conditions (faces minus scrambled, summed  
204 MDI) as a measure of changes in nodal strength during face processing. In the ranked outflow, the  
205 two filters agreed in identifying the bilateral inferior temporal gyrus and the left fusiform gyrus as  
206 the three areas with the largest increase in outflow in response to faces (see Figure 3d). Without  
207 structural priors, however, frontal regions were also ranked amongst the largest drivers at short  
208 post-stimulus latencies (e.g., rFPol, lFPol, see Supplementary File 2 for abbreviations) and the  
209 outflow increase in response to faces was more or less pronounced throughout the entire network.  
210 With the inclusion of structural priors, the ten largest drivers of face-related activity were all located  
211 in primary and secondary visual cortex, including the bilateral fusiform, lateral occipital cortex,  
212 lingual gyrus (e.g., VI), and regions in the temporal cortex (see Figure 3d), while the summed  
213 outflow from the rest of the network decreased progressively.



### Structurally-informed STOK

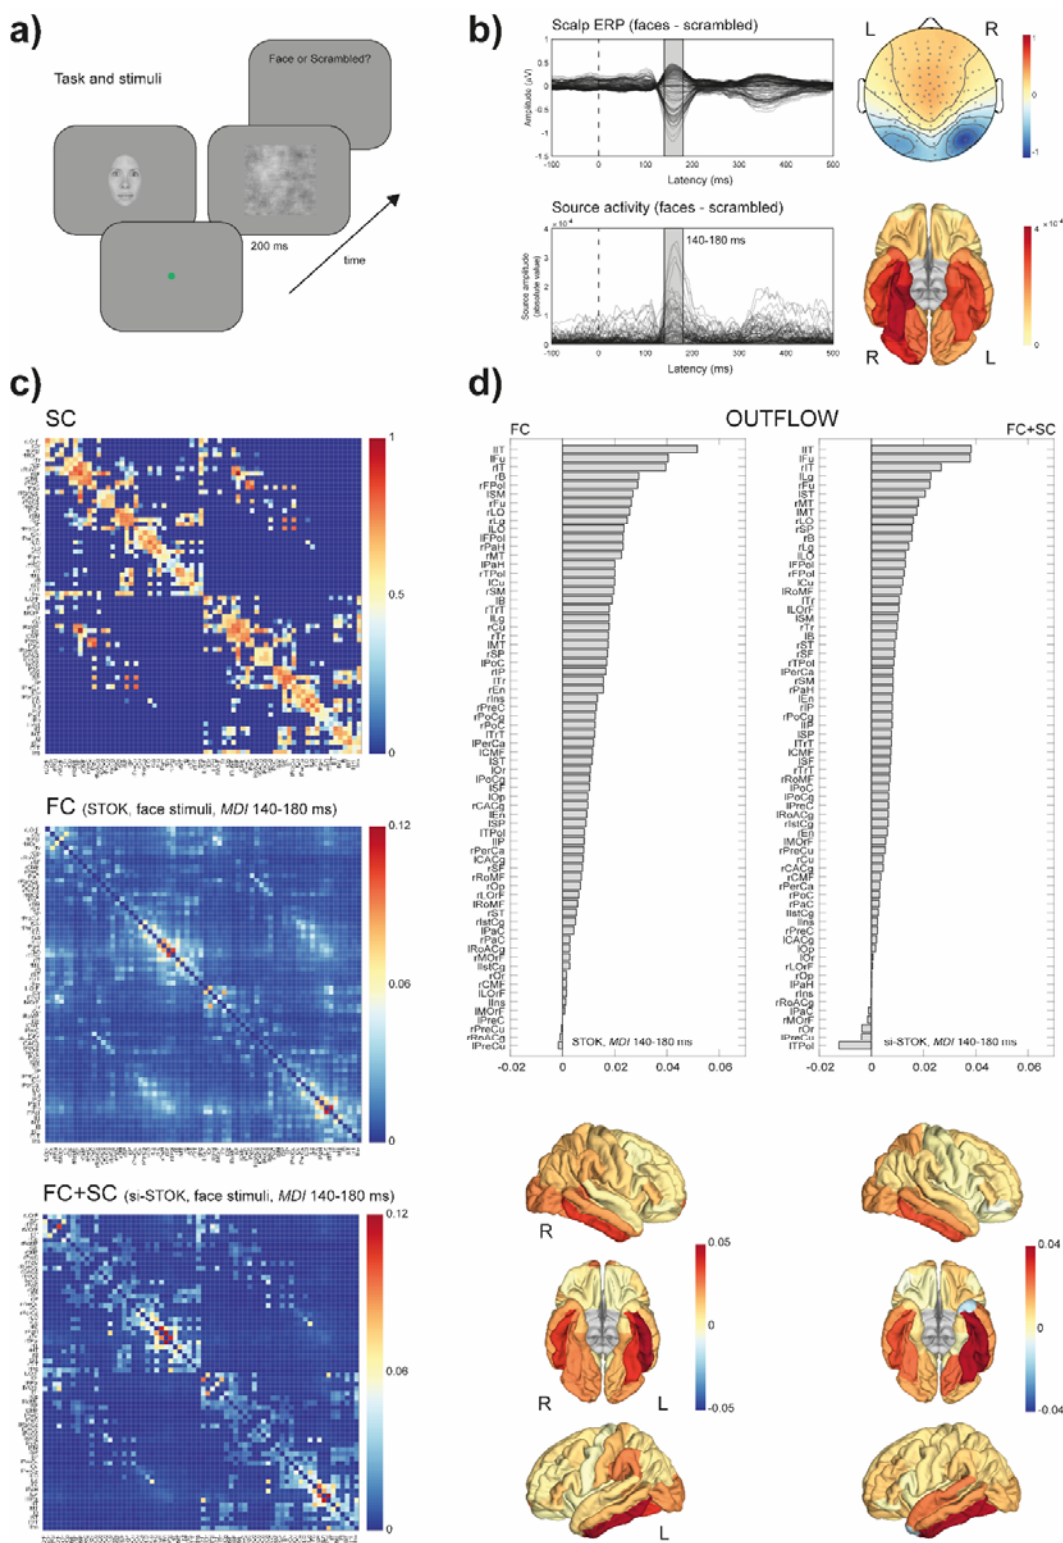

214

### 215 **Figure 3**

216 SC priors for large-scale FC analysis of human EEG data. a) Example of the sequence of events in one trial of the face  
 217 detection task. Face and scrambled stimuli were randomly interleaved across trials. EEG data were time-locked to the  
 218 onset of the stimuli. b) Scalp evoked responses showing the typical topography and time-course of the face-related  
 219 N170 component (faces minus scrambled, peak at 160 ms, upper panels). Source reconstruction localized the source of

## Structurally-informed STOK

220 face-selective responses in the right fusiform and nearby occipitotemporal areas (lower panels). c) The group SC prior  
221 matrix (upper panel) and the FC (MDI index) estimated with the regular STOK (central panel) and the si-STOK (lower  
222 panel) in response to face stimuli, averaged in a time window around the face-selective N170 response (from 140 to 180  
223 ms post-stimulus). d) Ranked summed outflow in response to faces (faces minus scrambled) from all the 68 areas,  
224 obtained using the regular STOK (bar plot on the left) and the si-STOK (bar plot on the right). See supplementary File 2  
225 for abbreviations. The inclusion of SC priors resulted in a less scattered topology of face-selective outflows, with the  
226 largest network drivers localized in primary, secondary visual areas and regions of the fusiform and inferior-temporal  
227 cortex.

228

229         These comparisons suggest that the inclusion of SC priors refines the topology of FC  
230 networks and portrays the contribution of each node in a more physiologically plausible way. This  
231 feature can aid the identification of hubs and critical modules in large-scale FC analysis. A further  
232 important question is whether SC priors also affect the temporal dynamics of FC. We evaluated this  
233 aspect in a final analysis where we compared the estimated changes in directed influences in  
234 response to face and scrambled stimuli, time-locked to the stimulus onset (from -100 to 500 ms).  
235 For this analysis, we considered a subset of regions in the core face network: the right inferior  
236 temporal gyrus (rIT), the right fusiform (rFu), and the right superior temporal sulcus (rB). The  
237 functional role of these brain areas in face processing is well-documented (Fox et al., 2009; Haxby  
238 et al., 2000) and their SC is a predictive feature of face-specific activity (Saygin et al., 2011),  
239 representing a functionally specialized module with known structure-function relationships. Figure  
240 4 shows the estimated time-varying MDI with and without SC priors. This comparison revealed  
241 clear differences that extended well beyond the basic outflow summary described above,  
242 specifically: 1) SC priors led to quantitative increases in unidirectional interactions at specific  
243 latencies, consistent with face-related evoked dynamics (e.g., from rFu to rIT, from rIT to rB); 2)  
244 SC priors more clearly show the sequence of unidirectional interactions between nodes (e.g., from  
245 rIT to rFu, followed by rFu to rIT); 3) SC priors shrunk and underestimated weak FC for SC-absent  
246 connections, reducing the risk of false positives (e.g., the connection from rIT to rB at very short  
247 post-stimulus latencies).

## Structurally-informed STOK

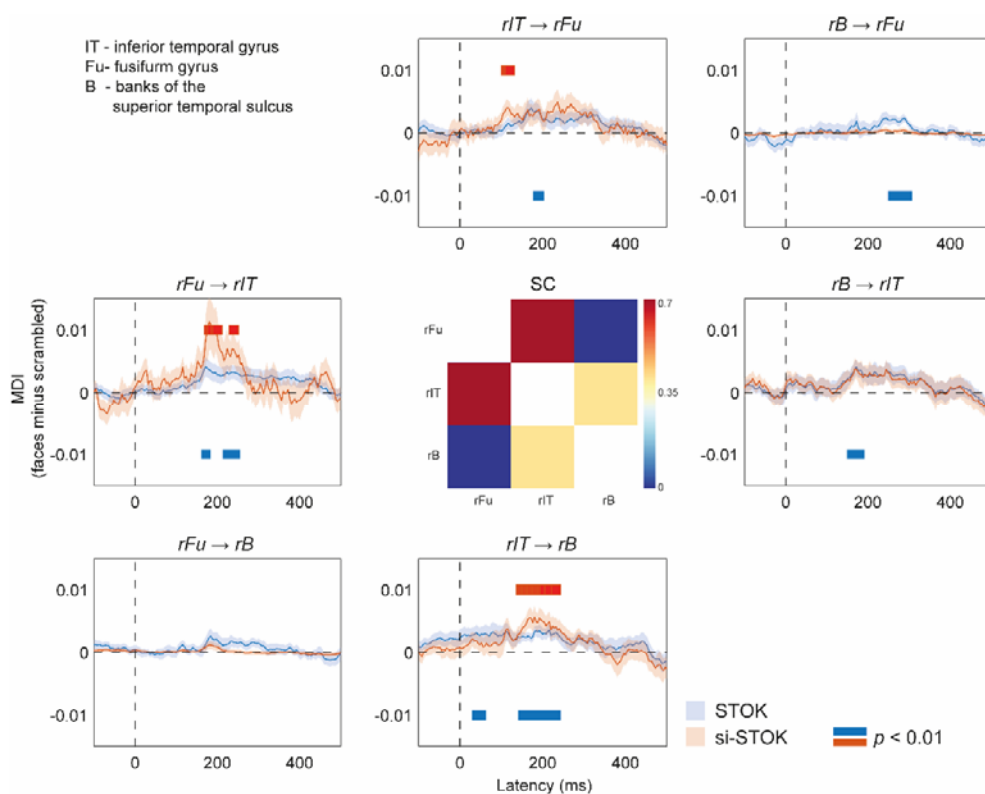

248

### 249 **Figure 4**

250 Effect of SC priors on the evoked dynamics of directed interactions in a subset of brain areas of the core face network.  
251 Shaded lines are standard errors of the mean. Red and blue horizontal bars highlights statistically significant differences  
252 (faces vs. scrambled, permutation test,  $p(\text{unc.}) < 0.01$ ).  
253

### 254 **Discussion**

255 We introduced and validated a new adaptive filter for combining structural and dynamic functional  
256 connectivity, the si-STOK. The algorithm builds on a recent variant of the general linear Kalman  
257 filter (Kalman, 1960; Milde et al., 2010; Pascucci et al., 2019) and allows incorporating structural  
258 priors in a multivariate autoregressive modeling framework with high temporal resolution. We  
259 tested the filter in rat epicranial recordings and human EEG data, using SC priors from a meta-  
260 analysis of tracer studies and DTI metrics respectively. Compared to FC without SC priors, we  
261 found the following advantages. First, FC estimates were more consistent and more resilient to  
262 noise. Second, SC priors promoted sparser FC networks and favored a more accurate identification  
263 of the main network drivers at expected post-stimulus latencies. Third, using SC as prior variance  
264 provided solutions with intrinsic protection against SC-related false negatives (for discordant SC-  
265 FC, the filter relied more on the data and less on the prior), and robustness against false positives  
266 (strong SC did not inflate FC unless supported by the data).

## Structurally-informed STOK

267           The first two aspects represent desired features considering the expected sparsity of FC  
268 networks and the sparse topology of the underlying structural links (Markov et al., 2012; Pagnotta  
269 et al., 2019; Valdés-Sosa et al., 2005). Previous work has shown how sparse and regularized  
270 approaches to FC analysis can decrease spurious connections, increase robustness to noise  
271 (Pagnotta et al., 2019), and counteract issues due to limited data points (Antonacci et al., 2019;  
272 Valdés-Sosa et al., 2005). Informing sparse solutions through the fixed topology of SC links has the  
273 additional benefit of introducing a biologically grounded space for regularization. This represents  
274 an advantage in conditions where regularization may have a strong impact on the model structure,  
275 such as under multicollinearity and non-independence amongst time-series (e.g., under linear  
276 mixing of source EEG activity due to volume conduction; Anzolin et al., 2019; Haufe et al., 2013).  
277 The resulting FC partly inherits the sparsity and topological properties of the SC matrices, while  
278 preserving the strength and directedness of functional interactions. This may ultimately facilitate  
279 graph analysis of functional networks, such as the identification of FC hubs, modules, and nodal  
280 properties without additional sparsity-based and consensus-based thresholding, which may lead to  
281 unstable and threshold-dependent network estimates (Garrison et al., 2015).

282           The third important feature of the si-STOK is the protection against false positives due to  
283 invalid SC priors. Previous studies, including large-scale validations of tractography pipelines, have  
284 reported a high ratio of invalid connections and a substantial amount of false positives (Maier-Hein  
285 et al., 2017). This caveat undermines the possibility to simply mask or weight FC by SC, increasing  
286 the risk of inflating FC for invalid SC connections. The proposed algorithm employs the  
287 Generalized Tikhonov method (Plato & Vainikko, 1990), a powerful and versatile regularization  
288 scheme under a Bayesian perspective where priors are combined with the observed data. Strong SC,  
289 therefore, does not necessarily inflate FC, as demonstrated in our test in benchmark data.  
290 Conversely, strong FC can still be detected in the absence of SC. This was also evident from the  
291 results in rat EEG data, where we observed FC between the primary somatosensory and the parietal  
292 cortex (e4 to e2, see Figure 2) even under a strong prior of no SC. Although reduced, FC between  
293 these areas was still larger compared to other connections for which SC was present but only weak  
294 FC was expected from physiology (e.g., from e4 to e8). This accommodates the possible divergence  
295 between FC and SC connections (Honey et al., 2009; Lim et al., 2019), which may arise from  
296 indirect structural connections, false negatives in SC (Damoiseaux & Greicius, 2009), or because of  
297 the differential engagement of specific functional modules under different task demands (Sokolov et  
298 al., 2019).

## Structurally-informed STOK

299 From our test in benchmark data it is also clear that, under certain circumstances, SC priors  
300 have minor effects on FC. This may occur, for instance, when using dense SC matrices in  
301 conditions where the signal-to-noise ratio is high, or when SC does not deviate drastically from FC.  
302 The rat EEG data analyzed here are an example. The rat cortex is essentially flat (lissencephalic)  
303 with few expected deep sources. The signal recorded at each electrode is therefore an accurate  
304 representation of the activity flowing through the structural pathways in the cortex underneath  
305 (Quairiaux et al., 2011). Using dense SC priors, generally in agreement with the expected FC,  
306 provided no additional or diverging information (see Figure 2b). In many other applications,  
307 however, signals are contaminated with multiple sources of noise and the recordings are not direct  
308 measurements of brain activity and connectivity. Under these common circumstances, SC priors  
309 may have more appreciable and beneficial effects on FC estimates. Our manipulation of added  
310 noise confirmed this advantage (Fig 2c).

311 The proposed algorithm is the first to integrate SC in a directed and dynamic measure of  
312 FC. We evaluated the effect of SC priors on large-scale dynamics of directed interactions in human  
313 source EEG activity during a face detection task. We considered dynamic interactions in a subset of  
314 regions corresponding to key nodes of the core face network (Haxby et al., 2000; Saygin et al.,  
315 2011). Our results showed that SC priors can also shape the temporal dynamics of FC. Particularly,  
316 incorporating SC priors revealed an initial face-selective increase of FC from the right inferior  
317 temporal gyrus to the fusiform, followed by an increase of FC from the fusiform to the inferior  
318 temporal gyrus and from the inferior temporal gyrus to the superior temporal sulcus. Without SC  
319 priors, a precise sequence of FC changes was less distinguishable and face-evoked increases in FC  
320 were also present at unreasonably short post-stimulus latencies (e.g., from the inferior temporal  
321 gyrus to the superior temporal sulcus, see Figure 4). The observed pattern may well reflect the  
322 build-up of face-specific processing supported by a hierarchy of recurrent interactions in the core  
323 face network: the inferior temporal cortex may first relay information about global aspects (e.g., the  
324 shape and coarse structure of the face stimuli used here) to the fusiform which then feedback  
325 information about finer details (Goffaux et al., 2011; Sugase-Miyamoto et al., 2011; Tovée, 1995).  
326 Although the interpretation of these results remains speculative and goes beyond the purpose of the  
327 current work, the results of this analysis are a clear example of how SC priors can enhance or  
328 downregulate time-varying dynamics in FC.

329 In sum, we provide a new method for dynamic FC that incorporates priors on structural  
330 connectivity for the analysis of multivariate electrophysiological signals. The algorithm offers a  
331 simple and powerful tool for multimodal imaging that can meaningfully contribute to integrative

## Structurally-informed STOK

332 approaches in network neuroscience (Crimi et al., 2016; Lei et al., 2015; Sokolov et al., 2019;  
333 Stephan et al., 2009). It allows the incorporation of various types of SC, weighted or binary,  
334 symmetric or directed. Because of its simple form, the algorithm can flexibly incorporate different  
335 types of SC priors, from basic metrics, such as the number of white matter fibers and the Euclidean  
336 distance, to graph-derived metrics, such as the path length and communicability (Vázquez-  
337 Rodríguez et al., 2019), as well as FC priors from other modalities.

## 338 **Methods**

### 339 **Benchmark EEG data**

#### 340 *Rat EEG recordings*

341 Benchmark data are publicly available EEG recordings from a grid of 16 stainless steel electrodes  
342 placed directly on the skull bone of 10 young Wistar rats (P21; half males). Data were collected  
343 during unilateral whisker stimulations under light isoflurane anesthesia (available from  
344 <https://osf.io/fd5ru>). Details about the recording can be found in the original publication (Plomp et  
345 al., 2014; Quairiaux et al., 2011). Data were acquired at 2000 Hz, bandpass filtered online, and  
346 down-sampled to 1000 Hz before connectivity analysis. All animal handling procedures were  
347 approved by the Office Vétérinaire Cantonal (Geneva, Switzerland) following Swiss Federal Laws.

#### 348 *Rat structural connectome*

349 Structural priors for the rat EEG benchmark were obtained from a published meta-analysis of  
350 histologically defined axonal connections between cortical regions in rats (Bota et al., 2015;  
351 Swanson et al., 2017). Particularly, we used one dataset containing ranked connection weights  
352 based on reported association and commissural connections. Details of the dataset can be found in  
353 the original publication (Dataset S3; from Swanson et al., 2017). Ranked connection weights for  
354 pairs of regions corresponding to the electrodes recording sites were manually selected by an expert  
355 biologist from primary visual areas, somatosensory, primary, and secondary motor areas, and  
356 cingulate cortex (see Supplementary File 1). Connection weights, ranging from 0 to 12 (from absent  
357 to very strong, see Supplementary File 1) were organized into a 16-by-16 structural connection  
358 matrix whose main diagonal elements (e.g., self-connections) were set to the maximum value of 12.  
359 The structural matrix was then normalized to the maximum value and used as a prior for the time-  
360 varying connectivity analyses of the rat EEG data.

## Structurally-informed STOK

### 361 **Human EEG data**

#### 362 *Task and stimuli*

363 EEG data were recorded while twenty participants (3 males, mean age =  $23 \pm 3.5$ ) performed a face  
364 detection task (see Figure 3a) in a dimly lit and electrically shielded room. Each trial lasted 1.2 s  
365 and started with a blank screen (500 ms). After the blank screen, one image (either a face or a  
366 scrambled image of a face) was presented for 200 ms and participants had the remaining 1000 ms to  
367 respond. The task was to report whether they saw a face or not (yes/no task) by pressing two  
368 buttons in a response box with their right hand (ResponsePixx, VPixx technologies). Faces and  
369 scrambled faces were randomly interleaved across trials. After the response and a random interval  
370 (from 600 to 900 ms), a new trial began. The experiment consisted of four blocks of 150 trials each,  
371 for a total of 600 trials, i.e., 300 with faces and 300 with scrambled faces. Face stimuli were female  
372 and male faces (4 by 4 degrees of visual angle, dva) taken from online repositories and cropped  
373 with a Gaussian kernel to smooth the borders. Scrambled images were obtained by fully  
374 randomizing the phase spectra of the original images (Ales et al., 2012). Stimuli were generated  
375 using Psychopy (Peirce, 2008) and presented on a VIEWPixx/3D display system (1920 × 1080  
376 pixels, refresh rate of 100 Hz). All participants provided written informed consent before the  
377 experiment and had a normal or corrected-to-normal vision. The experiment was approved by the  
378 local ethical committee.

#### 379 *EEG acquisition and preprocessing*

380 Data were recorded at 2048 Hz with a 128-channel Biosemi Active Two EEG system (Biosemi,  
381 Amsterdam, The Netherlands). Signal quality was ensured by monitoring and maintaining the offset  
382 between the active electrodes and the Common Mode Sense - Driven Right Leg (CMS-DRL)  
383 feedback loop under a standard value of  $\pm 20$  mV. After each recording session, individual 3D  
384 electrode positions were digitized using an ultrasound motion capture system (Zebris Medical  
385 GmbH). One participant was excluded due to too many motion artifacts, leaving 19 datasets for  
386 analysis. Further details on the recordings and preprocessing pipeline can be found in the original  
387 manuscript of the VEP-CON dataset (OpenNeuro Dataset ds003505; Pascucci et al., 2021).

#### 388 *EEG source imaging*

389 EEG source imaging was performed using Cartool (Brunet et al., 2011) and custom-made scripts in  
390 Matlab R2020b (9.9.0.1524771 Update 2). Source reconstruction was based on individual MRI data  
391 and the LAURA algorithm implemented in Cartool (regularization 6; spherical model with  
392 anatomical constraints, LSMAC), limiting the solution space to grey matter voxels. Source activity  
393 for freely oriented dipoles was extracted from all the source points inside each of the 68 cortical

## Structurally-informed STOK

394 areas and projected to a representative single direction for each area, using the singular values  
395 decomposition approach (Rubega et al., 2018; time window for estimating the main direction: 140-  
396 250 ms post-stimulus). Before functional connectivity analysis, a global z-score transformation was  
397 applied to the entire dataset of each participant. Epochs of source activity corresponding to trials  
398 with behavioral errors were then removed and the dataset was divided into two conditions,  
399 according to trials containing faces or scrambled stimuli.

### 400 *MRI acquisition and preprocessing*

401 A detailed description of the MR acquisition and preprocessing can be found in the original  
402 manuscript of the VEPCON dataset (OpenNeuro Dataset ds003505; Pascucci et al., 2021).

### 403 *Structural connectome*

404 Structural connectivity matrices were estimated from the reconstructed fiber orientation distribution  
405 (FOD) image using the SD\_stream deterministic streamline tractography algorithm implemented in  
406 MRtrix 3.0.0-RC1 (Tournier et al., 2019). Fiber streamline reconstruction started from seeds in the  
407 white matter that were spatially random, and the whole process completed when 1M fiber  
408 streamlines were reconstructed. At each streamline step of 0.5 mm, the local FOD was sampled, and  
409 from the current streamline tangent orientation, the orientation of the nearest FOD amplitude peak  
410 was estimated via a Newton optimization on the sphere. Fibers were stopped if a change in direction  
411 was greater than 45 degrees. Fibers with a length not in the 5-200 mm range were discarded. The  
412 streamline reconstruction process was complete when both ends of the fiber left the white matter  
413 mask. Then, for each scale, the parcellation was projected to the native DTI space after symmetric  
414 diffeomorphic co-registration between the T1w scan and the diffusion-free B0 using ANTs 2.2.0.  
415 Finally, the connectivity matrix was built according to the Desikan parcellation atlas, using the log  
416 of the number of fibers as the connectivity measure. Only 68 areas from cortical volumes were  
417 included in the structural matrix and used for functional connectivity analysis. A consensus group-  
418 representative structural brain connectivity matrix was generated from the connectomes of all  
419 participants connectomes using the method introduced in (Betzel et al., 2019). Each participants'  
420 connectivity matrix was then thresholded by preserving the group-representative connection density  
421 independently for intra- and interhemispheric connections. This allows retaining more inter-  
422 hemispheric connections in comparison to simple connectome thresholding. The resulting  
423 connection density is set to 30%. The median of the obtained structural connectomes across  
424 participants was then normalized to its maximum and used as a group structural prior for  
425 connectivity analysis.

426



## Structurally-informed STOK

### 427 **Adaptive filtering**

#### 428 *Self-Tuning Optimized Kalman filter (STOK)*

429 To incorporate structural priors in dynamic functional connectivity we used a linear adaptive filter,  
430 the Self-Tuning Optimized Kalman filter (STOK; Pascucci et al., 2019), as the base algorithm.  
431 STOK is a high-temporal resolution and noise resilient filter for modeling time-varying multivariate  
432 autoregressive processes (tv-MVAR) of the form:

$$Y_t = \sum_{k=1}^p A_{k,t} Y_{t-k} + \varepsilon_t; t \in [1, \dots, N]$$

433 [1]

434 where  $Y$  is a multi-trial and multivariate set of  $d$  time series of dimension [trials  $\times$   $d$ ] (e.g., activity  
435 signals from different brain regions),  $t$  refers to time samples (with  $N$  the total length of the time  
436 segment considered),  $A_{k,t}$  are  $[d \times d \times p \times N]$  matrices of autoregressive coefficients for each lag  $k$   
437 of a chosen model order  $p$ ,  $\varepsilon_t$  is zero-mean white noise with covariance matrix  $\Sigma_\varepsilon$  (also called the  
438 *innovation* process). Eq. [1] can be represented in the following state-space form:

439

$$x_t = \Phi_{t-1} x_{t-1} + \omega_{t-1}$$

440 [2]

$$z_t = H_t x_t + v_t$$

441 [3]

442  
443 where Eq. [2] represents the latent state  $x_t$  (e.g., the MVAR process) as a random walk from the  
444 previous state  $x_{t-1}$   $[d \times d \times p]$ , with transition matrix  $\Phi_{t-1}$  and uncorrelated zero-mean noise  $\omega$ . In  
445 Eq. [3], the observed data  $z_t$  are expressed as a linear combination of the latent state  $x_t$  and a  
446 projection matrix  $H_t$ , under white noise perturbation  $v_t$ . The link with Eq. [1] is established by  
447 recursively defining  $H_t$  from the past of the time-series in  $Y$  (from  $t - 1$  to the model order  $p$ ), and  
448  $z_t$  as the values of  $Y$  at present time  $t$ . This leads to the least-squares estimate:

$$\hat{x}_t^{(+)} = \frac{\hat{x}_t^{(-)} + c \tilde{H}_t^+ z_t}{1 + c}$$

449 [4]

450 in which the recursive update of  $\hat{x}_t^{(+)}$  is a weighted average of the previous state  $\hat{x}_t^{(-)}$  and a least-  
451 squares reconstruction from recent measurements  $\tilde{H}_t^+ z_t$ . The matrix  $\tilde{H}^+$  is the damped Moore-

## Structurally-informed STOK

452 Penrose pseudoinverse ( $^+$ ) of  $H$ , in which small singular values are attenuated to retain a  
 453 prespecified portion of the variance (here we retained 0.99 of the variance for the rat EEG data and  
 454 0.9 for the human EEG data). The variable  $c$  is a self-tuning adaptation constant that automatically  
 455 updates the speed of the filter depending on its residuals. The complete derivation of the STOK can  
 456 be found in (Pascucci et al., 2019).

### 457 *Structural priors*

458 The prior information is incorporated in the filter as a regularizing operator. Recall that the update  
 459 of  $\hat{x}_t^{(+)}$  in Eq. [4] —i.e., the estimated matrix of tv-MVAR coefficients, requires the ordinary least-  
 460 squares solution to  $\tilde{H}_t^+ z_t$ :

$$b_t^{ols} = \tilde{H}_t^+ z_t$$

461 [5]

462 with  $b_t^{ols}$  ( $dp \times d$ ) representing the matrix of autoregressive coefficients that updates the previous  
 463 state  $\hat{x}_t^{(-)}$ . A principled way to incorporate priors in Eq. [5] is the use of a *Generalized Tikhonov*  
 464 *regularization*, which admits the closed-form solution:

$$b_{i \leftarrow j, t}^* = x_{0, i \leftarrow j} + (\tilde{H}^T \tilde{H} + Q_{i \leftarrow j}^{-1})^+ \tilde{H}^T (z_{i, t} - \tilde{H} x_{0, i \leftarrow j}), \quad j \in [1, \dots, d]$$

465 [6]

466 where  $x_0$  is the expected value of  $b$ , and  $Q^{-1}$  is the inverse covariance matrix, or *precision matrix*,  
 467 of  $x_0$ .  $Q_{i \leftarrow j}^{-1}$  acts as a regularizing or Tikhonov matrix in Eq. [6]. The inclusion of a regularizing  
 468 matrix allows specifying penalties on the estimated coefficients. When the regularizing matrix is a  
 469 multiple of the identity matrix, the solution corresponds to the classical  $L_2$  norm. When the main  
 470 diagonal contains distinct elements, however, the solution penalizes the coefficients differently,  
 471 depending on the strength of the corresponding value in the regularizing matrix. This form of  
 472 regularization offers a straightforward solution for incorporating structural priors in a tv-MVAR  
 473 model. By solving Eq. [6] for each channel separately (e.g., for each signal in the multivariate time  
 474 series), elements on the main diagonal of  $Q^{-1}$  can be used to penalize the inflow from channel  $j$  to  
 475 channel  $i$  ( $i \leftarrow j$ ) depending on structural priors, that is, an a priori structure can be imposed on the  
 476 contribution of all the channels to the activity observed in each one.

477 Although this approach is deterministic, it has a natural Bayesian interpretation: Eq. [6] is  
 478 equivalent to expressing a prior belief on the functional connections  $b_{i \leftarrow j}$  entering each channel,  
 479 under a multivariate normal distribution  $N(b_{i \leftarrow j}; x_0, Q_{i \leftarrow j})$ . This regularization scheme requires the

## Structurally-informed STOK

480 non-trivial conversion of SC to FC priors. A commonly employed strategy is to set the prior  
 481 expectations on  $x_0$  to zero (e.g., no functional connectivity, Sokolov et al., 2019; Stephan et al.,  
 482 2009), and to define the prior variance  $Q_{i \leftarrow j}$  based on the strength of SC. Under the mild assumption  
 483 of a positive and monotonic relationship between structure and function, strong SC can be  
 484 translated into large FC prior variance  $Q_{i \leftarrow j}^{-1}$ , corresponding to small regularization values in  $Q_{i \leftarrow j}^{-1}$   
 485 that favor non-zero FC when supported by the data. Conversely, weak SC can be translated into  
 486 small prior variance, increasing the effect of regularization, and shrinking the tv-MVAR  
 487 coefficients toward their expected value of zero. Mapping SC to FC priors also requires the scaling  
 488 of SC to a range of suitable values, given that regularization acts on the magnitude and scale of  
 489 autoregressive coefficients. Normalized SC values are in the 0-1 range. For the sake of the present  
 490 work, we scaled SC from  $10^{-4}$  to 0.1, a range that produced clear effects of regularization for both  
 491 rat and human EEG data, without an excessive shrinking of all the coefficients.

492 Hence, the Tikhonov matrix  $Q_{i \leftarrow j}^{-1}$  in Eq. [6] is a diagonal matrix whose non-zero elements  
 493 represent the inverse prior variance for the functional connectivity between  $j$  input sources and a  
 494 receiver node  $i$ . By setting  $x_0$  equal to zero, we obtain:

$$b_{i \leftarrow j, t}^* = (\tilde{H}^T \tilde{H} + Q_{i \leftarrow j}^{-1})^+ \tilde{H}^T z_{i, t}.$$

495 [7]

496 In a Bayesian view, the precision matrix  $Q_{i \leftarrow j}^{-1} = \text{diag}(\frac{1}{SC_{i \leftarrow j}})$  in Eq. [7] determines the extent to  
 497 which the posterior estimate (e.g., the functional connectivity between two nodes) can deviate from  
 498 its expected value of zero. As a result, the estimated matrices of tv-MVAR coefficients combine  
 499 information from both functional and structural connectivity: weak SC decreases the prior variance  
 500 and increases regularization (e.g., expressing a strong belief that a functional connection is likely to  
 501 be absent, to reduce false-positive connections); strong SC increases the prior variance and  
 502 decreases regularization, allowing functional connections to deviate from zero when supported by  
 503 the functional data.

504 The new coefficients  $b_t^*$  obtained from Eq. [7] (posteriors) are then substituted in Eq. [4],  
 505 leading to the recursive update equation with structural priors:

$$\hat{x}_t^{(+)} = \frac{\hat{x}_t^{(-)} + c b_t^*}{1 + c}$$

506 [8]

## Structurally-informed STOK

507 which ultimately provides an estimate of tv-MVAR coefficients  $A$  informed by the properties of  
508 SC. The structural connectivity matrix can be either symmetric or asymmetric (e.g., for  
509 unidirectional priors), binary or weighted, with values that increase as a function of the expected  
510 strength of a connection between two nodes.

### 511 **Time-varying directed functional connectivity**

#### 512 *Directed connectivity measure*

513 In the analysis of FC, we used a measure of directed connectivity derived from the estimated  
514 matrices of tv-MVAR coefficients. This measure, that we termed Magnitude of Directed Influence  
515 (MDI), corresponds to the magnitude of autoregressive coefficients over lags, and quantifies the  
516 time-domain unidirectional influence from a sender  $j$  to a target node  $i$ :

$$517 \quad MDI_{i \leftarrow j, t} = \sqrt{\sum_{k=1}^p a_{i \leftarrow j, k, t}^2}.$$

518 [9]

519 A similar measure, called *direct causality* (DC), has previously been used to estimate the amount of  
520 direct causal influences in multivariate systems (Kamiński et al., 2001; Porcaro et al., 2009).

#### 521 *Rat EEG functional connectivity*

522 We tested the new algorithm and compared the performance against the regular STOK using  
523 benchmark EEG data from epicranial recordings in rats. These data provide a good benchmark for  
524 time-varying connectivity analysis because of the known structural and functional connectivity  
525 patterns. After whisker stimulation, the evoked FC is expected to follow the underlying SC, with  
526 the activity that propagates from the contralateral primary somatosensory cortex to nearby parietal  
527 and frontal regions, at short latencies (5-25 ms post-stimulation). This pattern was extensively  
528 validated in previous work (Pagnotta & Plomp, 2018; Pascucci et al., 2019; Plomp et al., 2014).

529 As a proof of concept, we first verified the effect of adding structural priors with different  
530 levels of sparsity. Two SC matrices were used as priors for the si-STOK, one obtained from the  
531 original SC (see Rat structural connectome and Supplementary File 1), the other obtained by  
532 applying proportional thresholding to the same SC, retaining only 25% of the strongest connections,  
533 setting the remaining to zero and the diagonal (self-self connections) to one. The MDI metric was  
534 derived from tv-MVAR models with a model order of 4 (Pagnotta & Plomp, 2018; Pascucci et al.,  
535 2019). In the comparison, we focused on the outflow from the contralateral somatosensory cortex to  
536 the rest of the network, at the peak latency. The peak latency was estimated from the results of the

## Structurally-informed STOK

537 regular STOK as 13 ms post-stimulus, in line with previous reports (Pascucci et al., 2019; Plomp et  
538 al., 2014).

539 In a second step, we compared the performance of the two filters under noise perturbation.  
540 We mixed the original data with white noise signals of the same size as the data and with an  
541 amplitude corresponding to the 95<sup>th</sup> percentile of the data. We varied the mixing ratio between the  
542 original data and the noise signals in five levels (from 0 to 0.5, in steps of 0.1; 0 = 100% of the data  
543 and 0% of the noise). The noise at each level was regenerated 30 times. For each iteration, we  
544 estimated: 1) the difference between the outflow from the contralateral somatosensory cortex and  
545 the average outflow of the network, at peak latency, and 2) a binary, directed adjacency matrix  
546 preserving 50% of the strongest connections at peak latency. From the first measure, we estimated  
547 the difference between the outflow from the primary somatosensory cortex and the network average  
548 outflow, across animals —i.e., the ability of the two algorithms to discriminate the somatosensory  
549 cortex as the main driver under noise perturbations. From the second measure, we derived a metric  
550 of consistency of the estimated networks under increasing noise. The consistency was obtained as  
551 the proportion of binary connections in the adjacency matrix that, for each level of noise larger than  
552 0, were identical to those estimated in the absence of noise —i.e., the consistency of the estimated  
553 strongest connections under increasing noise. For both measures, the zero-noise level was used as a  
554 baseline.

### 555 *Human EEG functional connectivity*

556 In the analysis of human EEG data, we evaluated the results of the STOK and si-STOK filter in  
557 estimating large-scale FC during face processing (see Figure 3a). For both filters, we used a model  
558 order of ten, in line with values used before (Pascucci et al., 2018, 2019). We first compared evoked  
559 activity after face and scrambled stimuli at the scalp and source level (see Figure 3b). We selected a  
560 time window centered on the scalp and the source N170 peak component (140-180 ms) as the  
561 latency of interest for FC results. In the N170 window, we evaluated the estimated difference in  
562 network MDI across conditions. For this difference, we compared the summed outflow obtained  
563 with the two filters, from each node of the 68-areas network (see Figure 3d). In a subsequent  
564 analysis, we focused on dynamic directed interactions among a subset of areas known to be  
565 involved in face processing (e.g., regions of the core face network, Haxby et al., 2000). We  
566 considered three areas, all in the right hemisphere: the fusiform gyrus (rFu), the inferior temporal  
567 gyrus (rIT), and the superior temporal sulcus (rB) (see Figure 4). We then compared directed  
568 influences among each pair of areas in response to face or scrambled stimuli across time.  
569 Significance was assessed using group-permutation statistics, as the proportion of group-averaged

## Structurally-informed STOK

570 MDI differences that were larger or smaller than the observed ones, after shuffling the sign of the  
571 difference across participants 100000 times.

### 572 **Acknowledgements**

573 The authors thank Guru Prasad Padmasola and Charles Quairiaux for providing guidelines and  
574 useful material for the analysis of the rat benchmark data, and Larry W. Swanson and Joel Hahn for  
575 providing the rat structural connectivity dataset.

576

### 577 **References**

578 Ales, J. M., Farzin, F., Rossion, B., & Norcia, A. M. (2012). An objective method for measuring  
579 face detection thresholds using the sweep steady-state visual evoked response. *Journal of*  
580 *Vision, 12*(10). <https://doi.org/10.1167/12.10.18>

581 Antonacci, Y., Toppi, J., Mattia, D., Pietrabissa, A., & Astolfi, L. (2019). Single-trial Connectivity  
582 Estimation through the Least Absolute Shrinkage and Selection Operator. *2019 41st Annual*  
583 *International Conference of the IEEE Engineering in Medicine and Biology Society*  
584 *(EMBC)*, 6422–6425. <https://doi.org/10.1109/EMBC.2019.8857909>

585 Anzolin, A., Presti, P., Van De Steen, F., Astolfi, L., Haufe, S., & Marinazzo, D. (2019).  
586 Quantifying the Effect of Demixing Approaches on Directed Connectivity Estimated  
587 Between Reconstructed EEG Sources. *Brain Topography, 32*(4), 655–674.  
588 <https://doi.org/10.1007/s10548-019-00705-z>

589 Betzel, R. F., Griffa, A., Hagmann, P., & Mišić, B. (2019). Distance-dependent consensus  
590 thresholds for generating group-representative structural brain networks. *Network*  
591 *Neuroscience, 3*(2), 475–496. [https://doi.org/10.1162/netn\\_a\\_00075](https://doi.org/10.1162/netn_a_00075)

592 Bota, M., Sporns, O., & Swanson, L. W. (2015). Architecture of the cerebral cortical association  
593 connectome underlying cognition. *Proceedings of the National Academy of Sciences of the*  
594 *United States of America, 112*(16), E2093-2101. <https://doi.org/10.1073/pnas.1504394112>

## Structurally-informed STOK

- 595 Brunet, D., Murray, M. M., & Michel, C. M. (2011). Spatiotemporal analysis of multichannel EEG:  
596 CARTOOL. *Computational intelligence and neuroscience*, 2011, 2.
- 597 Crimi, A., Doderer, L., Murino, V., & Sona, D. (2016). Effective brain connectivity through a  
598 constrained autoregressive model. *International Conference on Medical Image Computing*  
599 *and Computer-Assisted Intervention*, 140–147.
- 600 Damoiseaux, J. S., & Greicius, M. D. (2009). Greater than the sum of its parts: A review of studies  
601 combining structural connectivity and resting-state functional connectivity. *Brain structure*  
602 *and function*, 213(6), 525–533.
- 603 Deco, G., Ponce-Alvarez, A., Mantini, D., Romani, G. L., Hagmann, P., & Corbetta, M. (2013).  
604 Resting-State Functional Connectivity Emerges from Structurally and Dynamically Shaped  
605 Slow Linear Fluctuations. *Journal of Neuroscience*, 33(27), 11239–11252.  
606 <https://doi.org/10.1523/JNEUROSCI.1091-13.2013>
- 607 Desikan, R. S., Ségonne, F., Fischl, B., Quinn, B. T., Dickerson, B. C., Blacker, D., Buckner, R. L.,  
608 Dale, A. M., Maguire, R. P., & Hyman, B. T. (2006). An automated labeling system for  
609 subdividing the human cerebral cortex on MRI scans into gyral based regions of interest.  
610 *Neuroimage*, 31(3), 968–980.
- 611 Eichenbaum, A., Pappas, I., Lurie, D., Cohen, J. R., & D’Esposito, M. (2021). Differential  
612 contributions of static and time-varying functional connectivity to human behavior. *Network*  
613 *Neuroscience*, 5(1), 145–165. [https://doi.org/10.1162/netn\\_a\\_00172](https://doi.org/10.1162/netn_a_00172)
- 614 Filatova, O. G., Yang, Y., Dewald, J. P. A., Tian, R., Maceira-Elvira, P., Takeda, Y., Kwakkel, G.,  
615 Yamashita, O., & van der Helm, F. C. T. (2018). Dynamic Information Flow Based on EEG  
616 and Diffusion MRI in Stroke: A Proof-of-Principle Study. *Frontiers in Neural Circuits*, 12,  
617 79. <https://doi.org/10.3389/fncir.2018.00079>
- 618 Fox, C. J., Iaria, G., & Barton, J. J. S. (2009). Defining the face processing network: Optimization  
619 of the functional localizer in fMRI. *Human Brain Mapping*, 30(5), 1637–1651.  
620 <https://doi.org/10.1002/hbm.20630>

## Structurally-informed STOK

- 621 Garrison, K. A., Scheinost, D., Finn, E. S., Shen, X., & Constable, R. T. (2015). The (in)stability of  
622 functional brain network measures across thresholds. *NeuroImage*, *118*, 651–661.  
623 <https://doi.org/10.1016/j.neuroimage.2015.05.046>
- 624 Glomb, K., Queralt, J. R., Pascucci, D., Defferrard, M., Tourbier, S., Carboni, M., Rubega, M.,  
625 Vulliemoz, S., Plomp, G., & Hagmann, P. (2020). Connectome spectral analysis to track  
626 EEG task dynamics on a subsecond scale. *NeuroImage*, *221*, 117137.
- 627 Goffaux, V., Peters, J., Haubrechts, J., Schiltz, C., Jansma, B., & Goebel, R. (2011). From Coarse to  
628 Fine? Spatial and Temporal Dynamics of Cortical Face Processing. *Cerebral Cortex*, *21*(2),  
629 467–476. <https://doi.org/10.1093/cercor/bhq112>
- 630 Hagmann, P., Cammoun, L., Gigandet, X., Meuli, R., Honey, C. J., Wedeen, V. J., & Sporns, O.  
631 (2008). Mapping the structural core of human cerebral cortex. *PLoS biology*, *6*(7), e159.
- 632 Haufe, S., Nikulin, V. V., Müller, K.-R., & Nolte, G. (2013). A critical assessment of connectivity  
633 measures for EEG data: A simulation study. *Neuroimage*, *64*, 120–133.
- 634 Haxby, J. V., Hoffman, E. A., & Gobbini, M. I. (2000). The distributed human neural system for  
635 face perception. *Trends in Cognitive Sciences*, *4*(6), 223–233.  
636 [https://doi.org/10.1016/S1364-6613\(00\)01482-0](https://doi.org/10.1016/S1364-6613(00)01482-0)
- 637 Honey, C. J., Sporns, O., Cammoun, L., Gigandet, X., Thiran, J. P., Meuli, R., & Hagmann, P.  
638 (2009). Predicting human resting-state functional connectivity from structural connectivity.  
639 *Proceedings of the National Academy of Sciences*, *106*(6), 2035–2040.  
640 <https://doi.org/10.1073/pnas.0811168106>
- 641 Honey, C. J., Thivierge, J.-P., & Sporns, O. (2010). Can structure predict function in the human  
642 brain? *NeuroImage*, *52*(3), 766–776. <https://doi.org/10.1016/j.neuroimage.2010.01.071>
- 643 Kalman, R. E. (1960). A new approach to linear filtering and prediction problems. *Journal of basic*  
644 *Engineering*, *82*(1), 35–45.



## Structurally-informed STOK

- 645 Kamiński, M., Ding, M., Truccolo, W. A., & Bressler, S. L. (2001). Evaluating causal relations in  
646 neural systems: Granger causality, directed transfer function and statistical assessment of  
647 significance. *Biological cybernetics*, 85(2), 145–157.
- 648 Lei, X., Wu, T., & Valdes-Sosa, P. (2015). Incorporating priors for EEG source imaging and  
649 connectivity analysis. *Frontiers in neuroscience*, 9, 284.
- 650 Lim, S., Radicchi, F., van den Heuvel, M. P., & Sporns, O. (2019). Discordant attributes of  
651 structural and functional brain connectivity in a two-layer multiplex network. *Scientific*  
652 *Reports*, 9(1), 2885. <https://doi.org/10.1038/s41598-019-39243-w>
- 653 Maier-Hein, K. H., Neher, P. F., Houde, J.-C., Côté, M.-A., Garyfallidis, E., Zhong, J.,  
654 Chamberland, M., Yeh, F.-C., Lin, Y.-C., Ji, Q., Reddick, W. E., Glass, J. O., Chen, D. Q.,  
655 Feng, Y., Gao, C., Wu, Y., Ma, J., Renjie, H., Li, Q., ... Descoteaux, M. (2017). The  
656 challenge of mapping the human connectome based on diffusion tractography. *Nature*  
657 *Communications*, 8(1), 1349. <https://doi.org/10.1038/s41467-017-01285-x>
- 658 Markov, N., Ercsey-Ravasz, M. M., Ribeiro Gomes, A. R., Lamy, C., Magrou, L., Vezoli, J.,  
659 Misery, P., Falchier, A., Quilodran, R., & Gariel, M. A. (2012). A weighted and directed  
660 interareal connectivity matrix for macaque cerebral cortex. *Cerebral cortex*, 24(1), 17–36.
- 661 Milde, T., Leistriz, L., Astolfi, L., Miltner, W. H., Weiss, T., Babiloni, F., & Witte, H. (2010). A  
662 new Kalman filter approach for the estimation of high-dimensional time-variant multivariate  
663 AR models and its application in analysis of laser-evoked brain potentials. *Neuroimage*,  
664 50(3), 960–969.
- 665 Mišić, B., Betzel, R. F., de Reus, M. A., van den Heuvel, M. P., Berman, M. G., McIntosh, A. R., &  
666 Sporns, O. (2016). Network-Level Structure-Function Relationships in Human Neocortex.  
667 *Cerebral Cortex (New York, N.Y.: 1991)*, 26(7), 3285–3296.  
668 <https://doi.org/10.1093/cercor/bhw089>

## Structurally-informed STOK

- 669 Pagnotta, M. F., Dhamala, M., & Plomp, G. (2018). Benchmarking nonparametric Granger  
670 causality: Robustness against downsampling and influence of spectral decomposition  
671 parameters. *NeuroImage*, *183*, 478–494.
- 672 Pagnotta, M. F., & Plomp, G. (2018). Time-varying MVAR algorithms for directed connectivity  
673 analysis: Critical comparison in simulations and benchmark EEG data. *PloS one*, *13*(6),  
674 e0198846.
- 675 Pagnotta, M. F., Plomp, G., & Pascucci, D. (2019). A regularized and smoothed General Linear  
676 Kalman Filter for more accurate estimation of time-varying directed connectivity\*. *2019*  
677 *41st Annual International Conference of the IEEE Engineering in Medicine and Biology*  
678 *Society (EMBC)*, 611–615. <https://doi.org/10.1109/EMBC.2019.8857915>
- 679 Pascucci, D., Hervais-Adelman, A., & Plomp, G. (2018). Gating by induced A– $\Gamma$  asynchrony in  
680 selective attention. *Human Brain Mapping*, *39*(10), 3854–3870.
- 681 Pascucci, D., Rubega, M., & Plomp, G. (2019). Modeling time-varying brain networks with a self-  
682 tuning optimized Kalman filter. *bioRxiv*, 856179.
- 683 Pascucci, D., Tourbier, S., Rue-Queralt, J., Carboni, M., Haggmann, P., & Plomp, G. (2021). Source  
684 imaging of high-density visual evoked potentials with multi-scale brain parcellations and  
685 connectomes. *bioRxiv*.
- 686 Peirce, J. W. (2008). Generating stimuli for neuroscience using PsychoPy. *Frontiers in*  
687 *neuroinformatics*, *2*. <https://www.ncbi.nlm.nih.gov/pmc/articles/PMC2636899/>
- 688 Petersen, S. E., & Sporns, O. (2015). Brain Networks and Cognitive Architectures. *Neuron*, *88*(1),  
689 207–219. <https://doi.org/10.1016/j.neuron.2015.09.027>
- 690 Plato, R., & Vainikko, G. (1990). On the regularization of projection methods for solving III-posed  
691 problems. *Numerische Mathematik*, *57*(1), 63–79.
- 692 Plomp, G., Quairiaux, C., Michel, C. M., & Astolfi, L. (2014). The physiological plausibility of  
693 time-varying Granger-causal modeling: Normalization and weighting by spectral power.  
694 *NeuroImage*, *97*, 206–216.

## Structurally-informed STOK

- 695 Porcaro, C., Zappasodi, F., Rossini, P. M., & Tecchio, F. (2009). Choice of multivariate  
696 autoregressive model order affecting real network functional connectivity estimate. *Clinical*  
697 *Neurophysiology*, *120*(2), 436–448.
- 698 Quairiaux, C., Mégevand, P., Kiss, J. Z., & Michel, C. M. (2011). Functional development of large-  
699 scale sensorimotor cortical networks in the brain. *Journal of Neuroscience*, *31*(26), 9574–  
700 9584.
- 701 Rubega, M., Carboni, M., Seeber, M., Pascucci, D., Tourbier, S., Toscano, G., Van Mierlo, P.,  
702 Hagmann, P., Plomp, G., & Vulliemoz, S. (2018). Estimating EEG source dipole orientation  
703 based on singular-value decomposition for connectivity analysis. *Brain topography*, 1–16.
- 704 Rué-Queralt, J., Glomb, K., Pascucci, D., Tourbier, S., Carboni, M., Vulliémoz, S., Plomp, G., &  
705 Hagmann, P. (2021). The connectome spectrum as a canonical basis for a sparse  
706 representation of fast brain activity. *BioRxiv*, 2021.03.03.433561.  
707 <https://doi.org/10.1101/2021.03.03.433561>
- 708 Saygin, Z. M., Osher, D. E., Koldewyn, K., Reynolds, G., Gabrieli, J. D. E., & Saxe, R. R. (2011).  
709 Anatomical connectivity patterns predict face-selectivity in the fusiform gyrus. *Nature*  
710 *neuroscience*, *15*(2), 321–327. <https://doi.org/10.1038/nn.3001>
- 711 Skudlarski, P., Jagannathan, K., Calhoun, V. D., Hampson, M., Skudlarska, B. A., & Pearlson, G.  
712 (2008). Measuring brain connectivity: Diffusion tensor imaging validates resting state  
713 temporal correlations. *NeuroImage*, *43*(3), 554–561.  
714 <https://doi.org/10.1016/j.neuroimage.2008.07.063>
- 715 Sokolov, A. A., Zeidman, P., Erb, M., Rylvlin, P., Pavlova, M. A., & Friston, K. J. (2019). Linking  
716 structural and effective brain connectivity: Structurally informed Parametric Empirical  
717 Bayes (si-PEB). *Brain Structure and Function*, *224*(1), 205–217.  
718 <https://doi.org/10.1007/s00429-018-1760-8>
- 719 Sporns, O. (2010). *Networks of the Brain*. MIT press.

## Structurally-informed STOK

- 720 Stephan, K. E., Tittgemeyer, M., Knösche, T. R., Moran, R. J., & Friston, K. J. (2009).  
721 Tractography-based priors for dynamic causal models. *NeuroImage*, 47(4), 1628–1638.  
722 <https://doi.org/10.1016/j.neuroimage.2009.05.096>
- 723 Sugase-Miyamoto, Y., Matsumoto, N., & Kawano, K. (2011). Role of Temporal Processing Stages  
724 by Inferior Temporal Neurons in Facial Recognition. *Frontiers in Psychology*, 2.  
725 <https://doi.org/10.3389/fpsyg.2011.00141>
- 726 Swanson, L. W., Hahn, J. D., & Sporns, O. (2017). Organizing principles for the cerebral cortex  
727 network of commissural and association connections. *Proceedings of the National Academy*  
728 *of Sciences*, 114(45), E9692–E9701. <https://doi.org/10.1073/pnas.1712928114>
- 729 Takeda, Y., Suzuki, K., Kawato, M., & Yamashita, O. (2019). MEG Source Imaging and Group  
730 Analysis Using VBMEG. *Frontiers in Neuroscience*, 13.  
731 <https://doi.org/10.3389/fnins.2019.00241>
- 732 Tournier, J.-D., Smith, R., Raffelt, D., Tabbara, R., Dhollander, T., Pietsch, M., Christiaens, D.,  
733 Jeurissen, B., Yeh, C.-H., & Connelly, A. (2019). MRtrix3: A fast, flexible and open  
734 software framework for medical image processing and visualisation. *NeuroImage*, 202,  
735 116137. <https://doi.org/10.1016/j.neuroimage.2019.116137>
- 736 Tovée, M. J. (1995). Face Recognition: What are faces for? *Current Biology*, 5(5), 480–482.  
737 [https://doi.org/10.1016/S0960-9822\(95\)00096-0](https://doi.org/10.1016/S0960-9822(95)00096-0)
- 738 Valdés-Sosa, P. A., Sánchez-Bornot, J. M., Lage-Castellanos, A., Vega-Hernández, M., Bosch-  
739 Bayard, J., Melie-García, L., & Canales-Rodríguez, E. (2005). Estimating brain functional  
740 connectivity with sparse multivariate autoregression. *Philosophical Transactions of the*  
741 *Royal Society of London B: Biological Sciences*, 360(1457), 969–981.
- 742 Vázquez-Rodríguez, B., Suárez, L. E., Markello, R. D., Shafiei, G., Paquola, C., Hagmann, P.,  
743 Heuvel, M. P. van den, Bernhardt, B. C., Spreng, R. N., & Misic, B. (2019). Gradients of  
744 structure–function tethering across neocortex. *Proceedings of the National Academy of*  
745 *Sciences*, 116(42), 21219–21227. <https://doi.org/10.1073/pnas.1903403116>

## Structurally-informed STOK

746
